# Supplementary material for: Rab29 activation of the Parkinson's disease‐associated LRRK2 kinase
Source: PubMed Central journal article supplement (PMC5753036; doi:10.15252/embj.201798099), 2017-12-06

# Figure 7

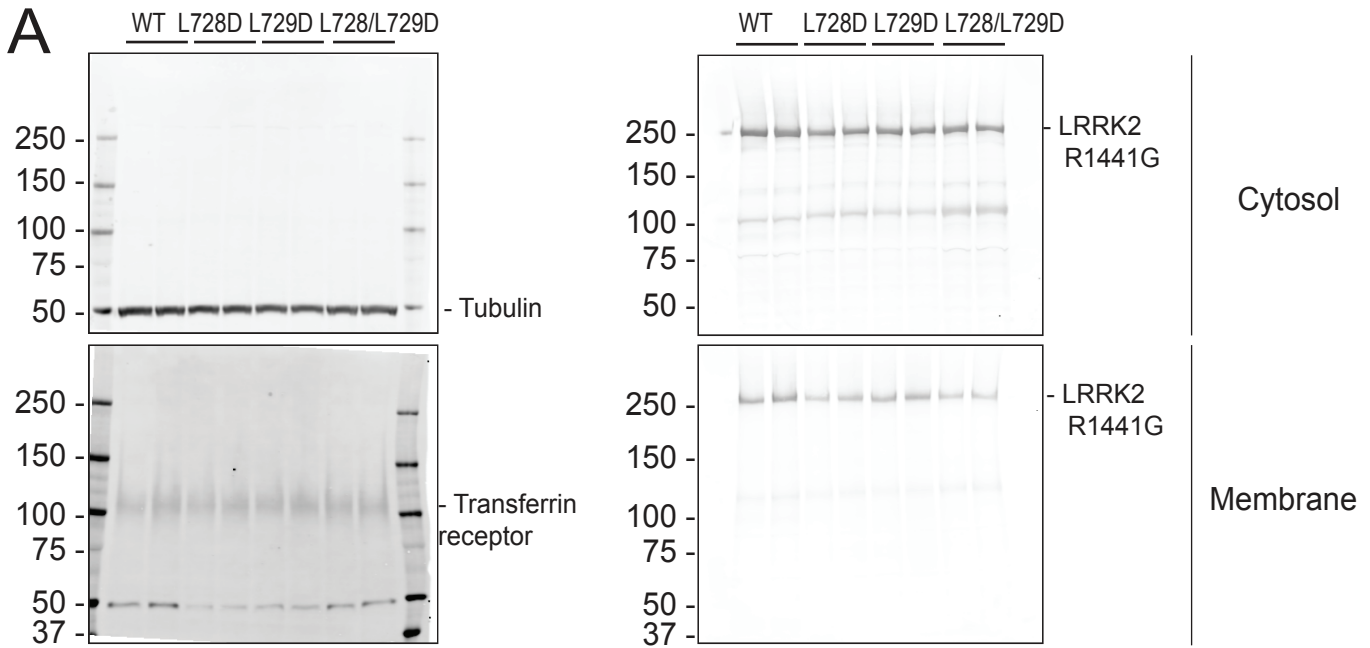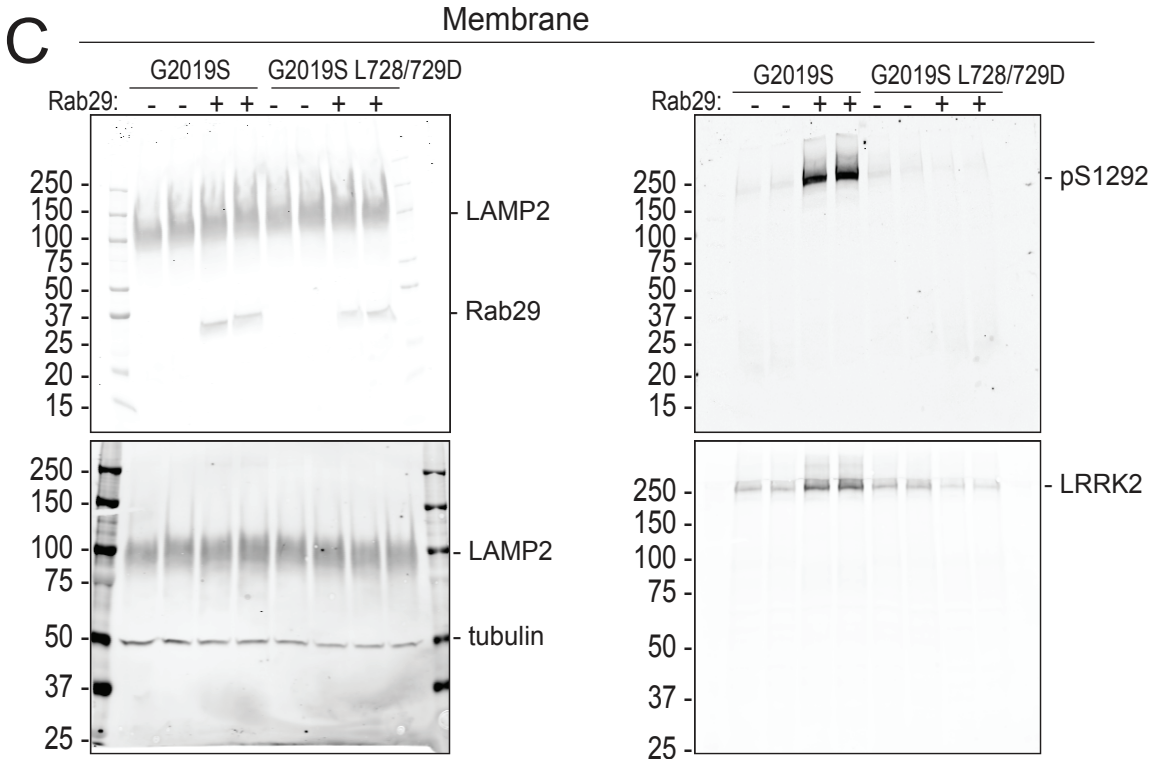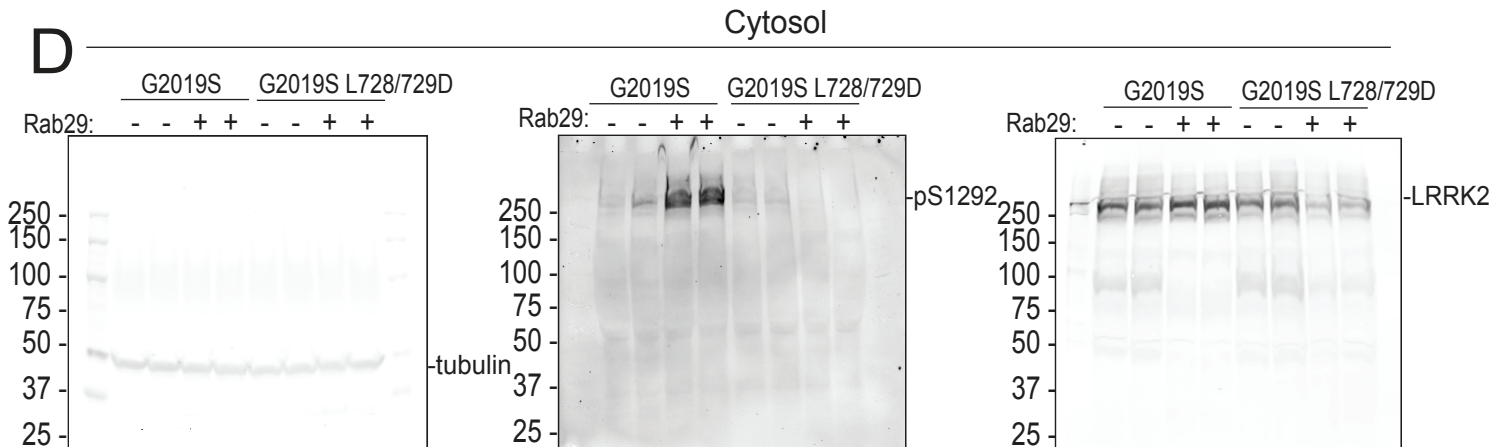

Supplement: EMBJ-37-1-s004.pdf [file EMBJ-37-1-s004.pdf]
