# Supplementary material for: Rab29 activation of the Parkinson's disease‐associated LRRK2 kinase
Source: PubMed Central journal article supplement (PMC5753036; doi:10.15252/embj.201798099), 2017-12-06

# Source data - Figure 9

Fig9A

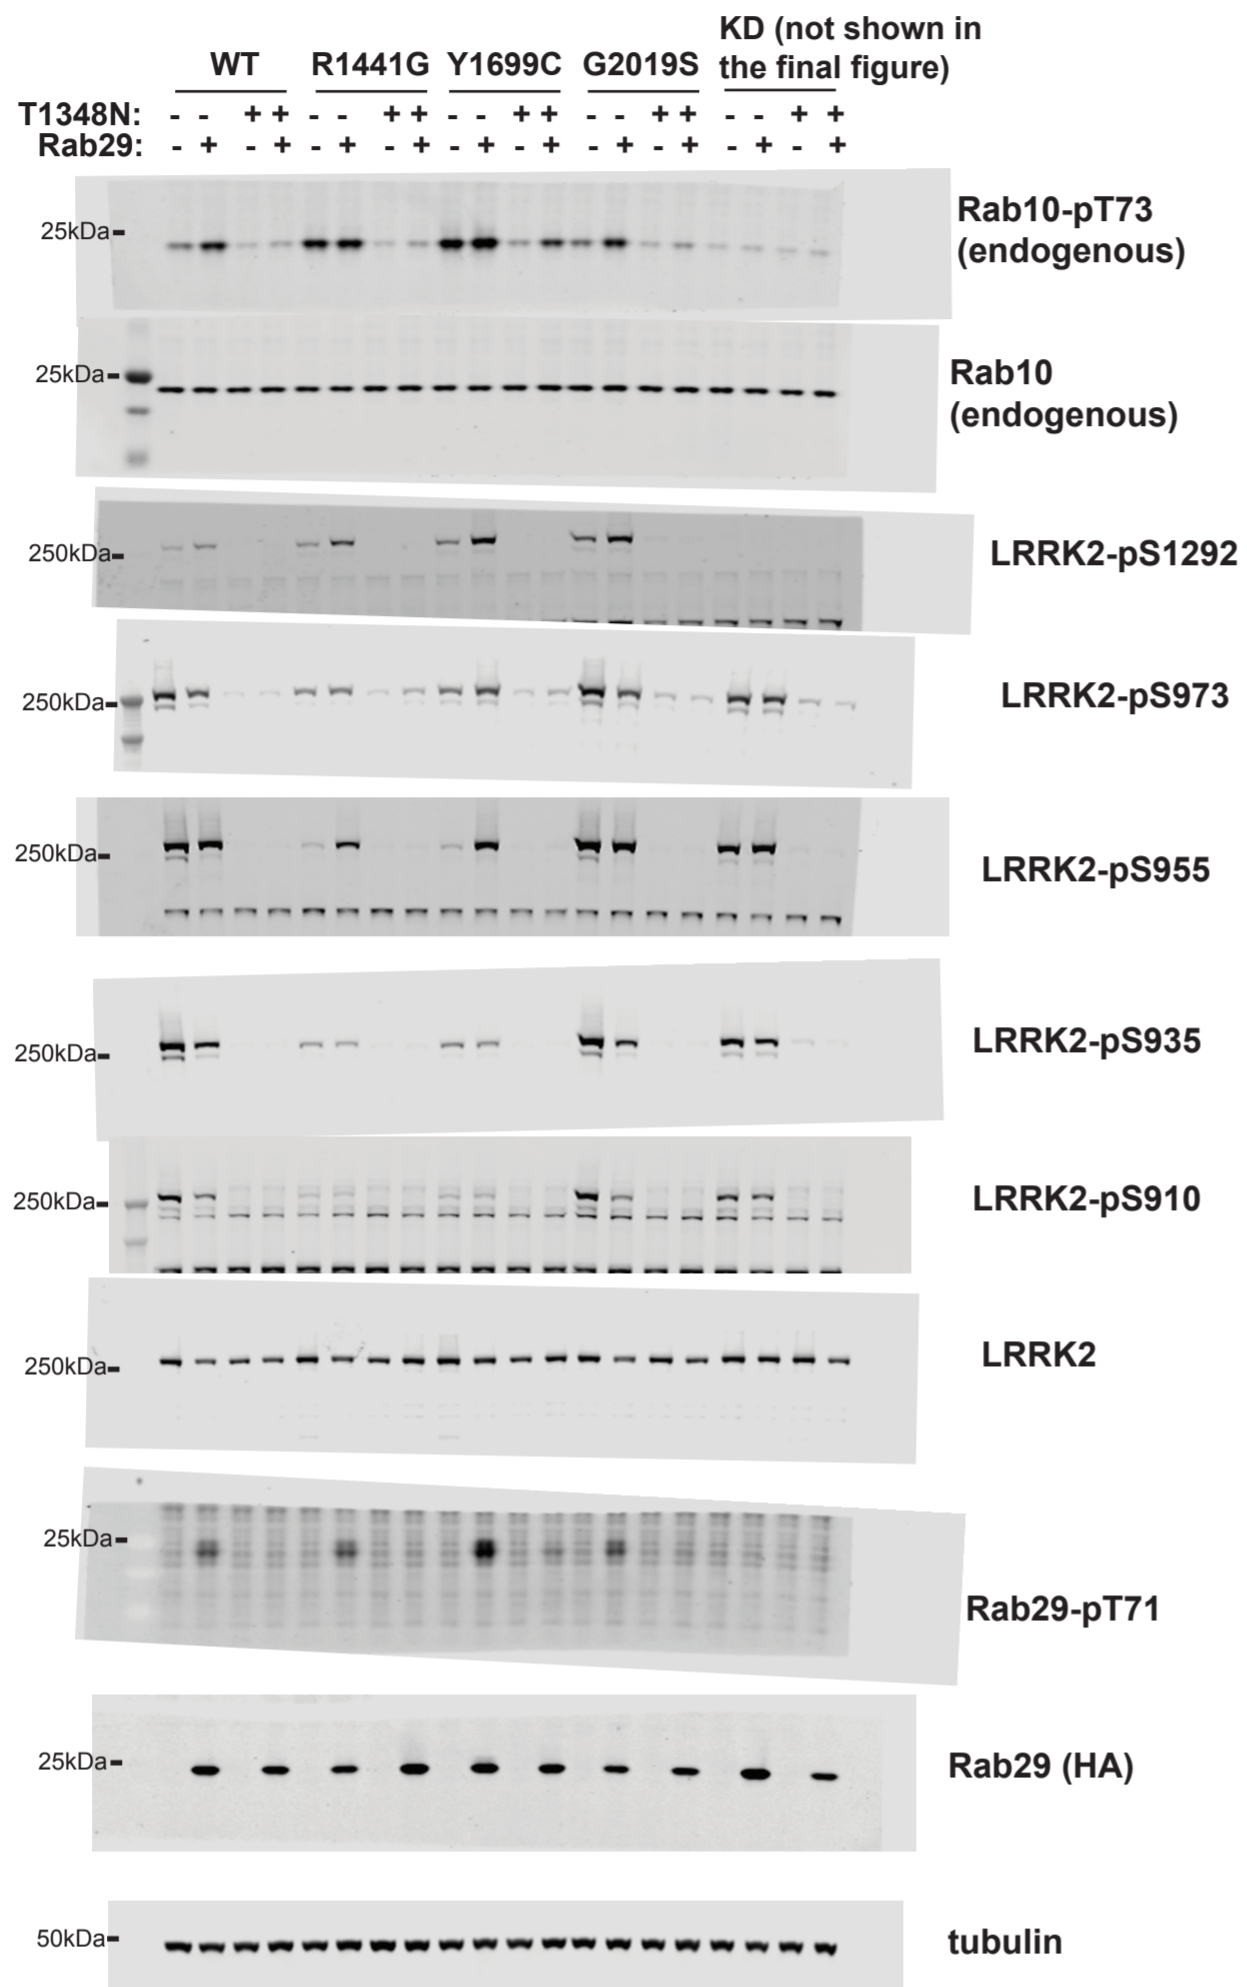

Fig9B

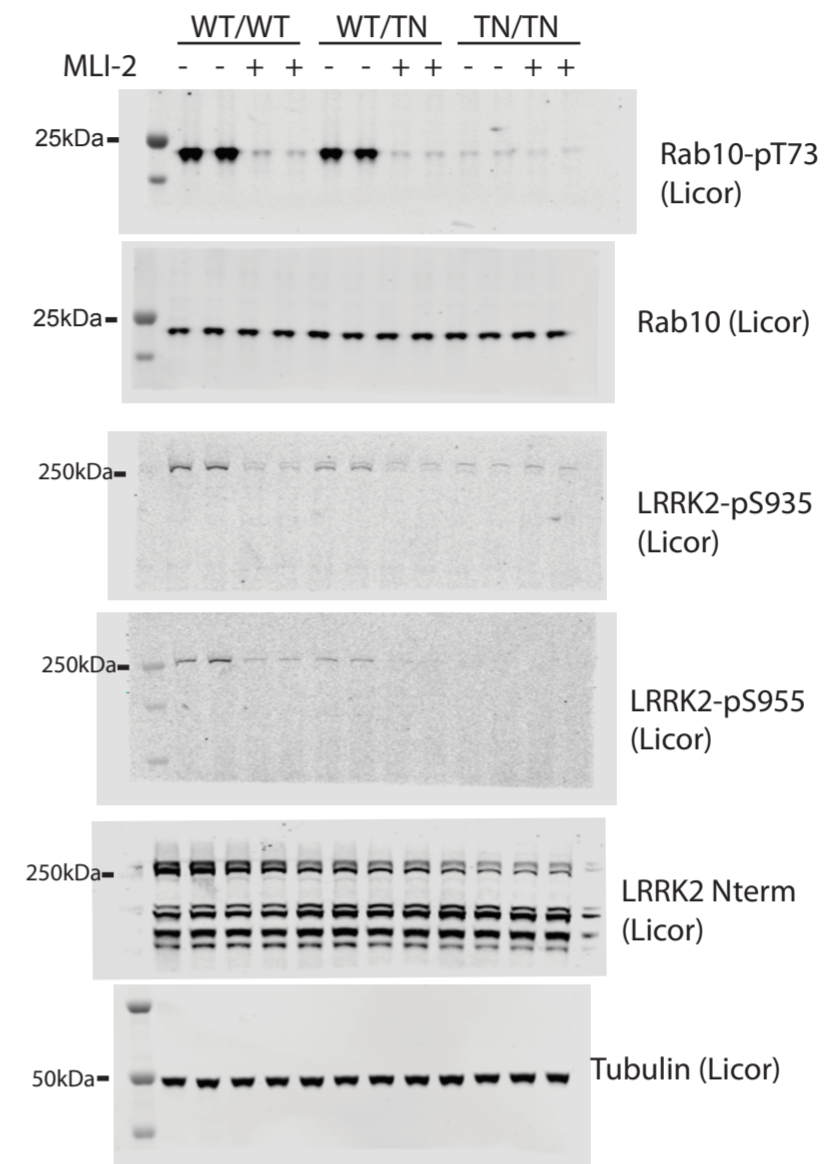

Fig9D

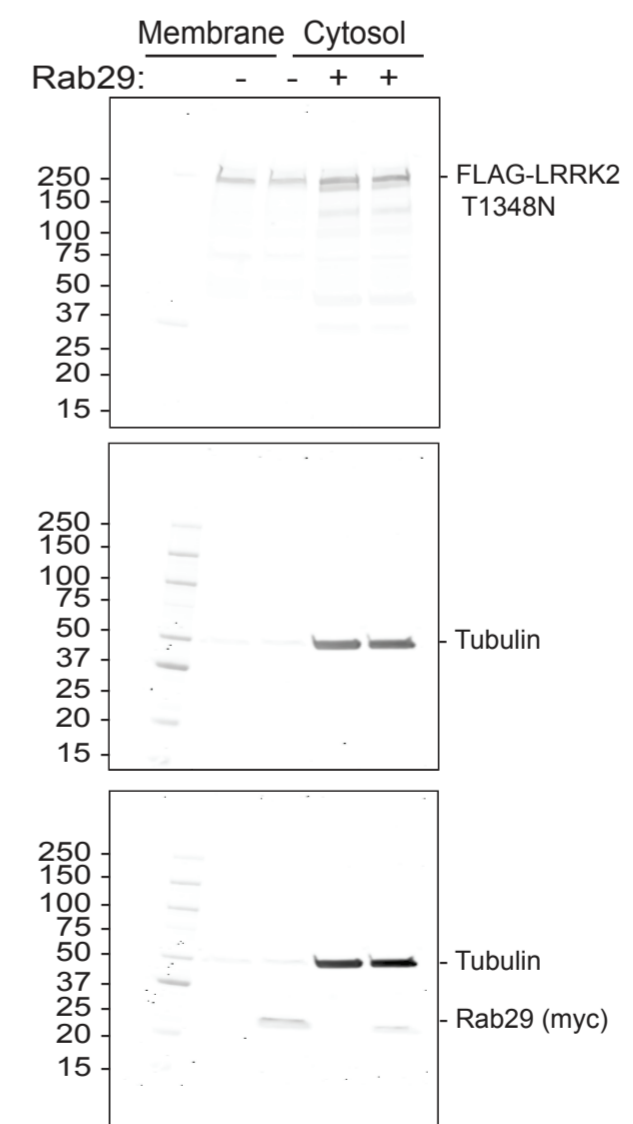

Supplement: EMBJ-37-1-s005.pdf [file EMBJ-37-1-s005.pdf]
